# Supplementary material
Source: HighWire-hosted journal article supplement (https://erj.ersjournals.com/content/52/6/1800742)

Fig E6

A

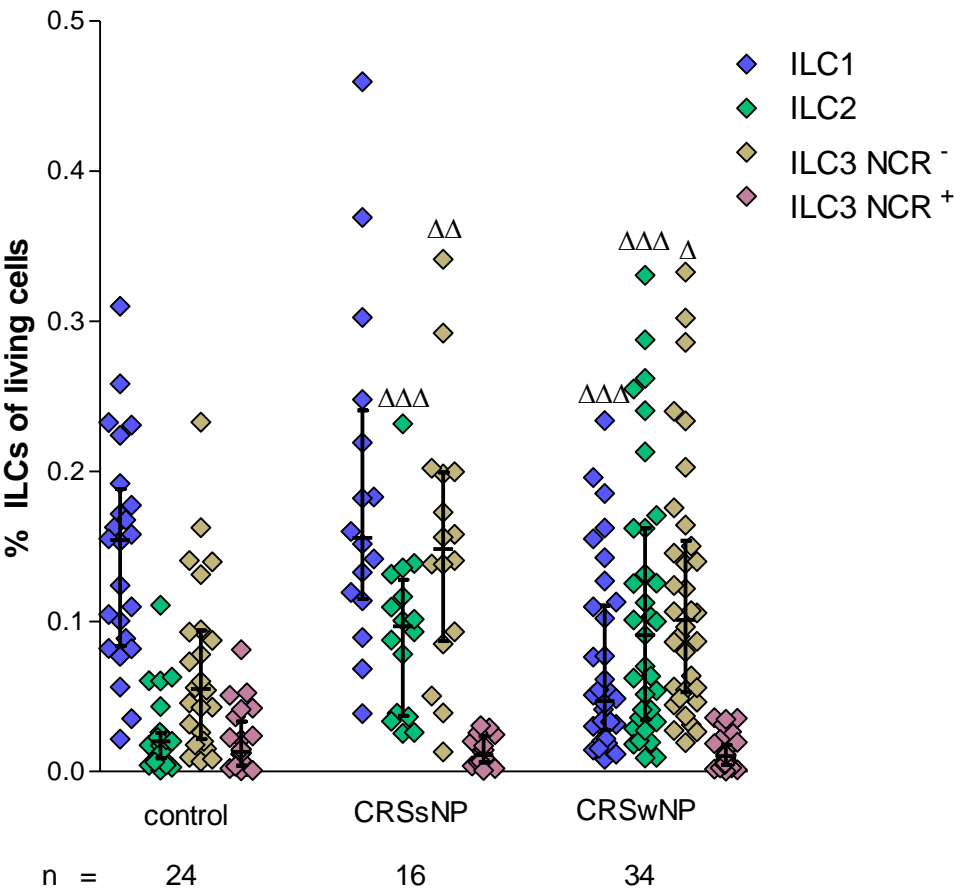

B

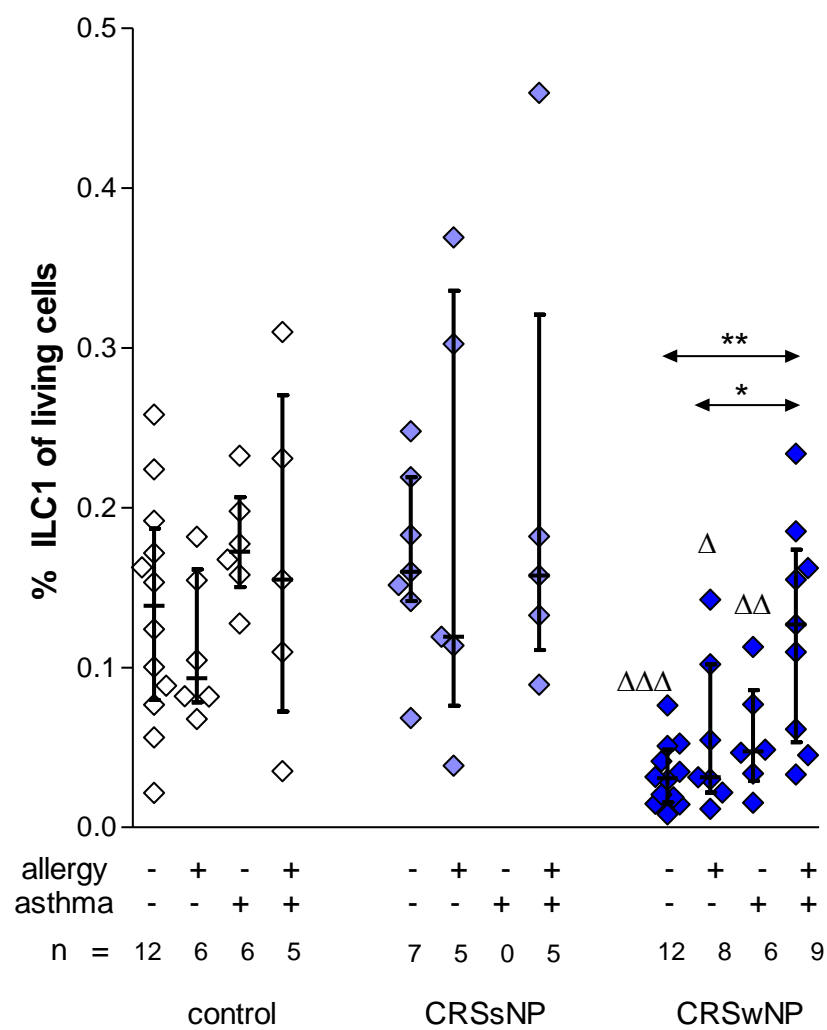

C

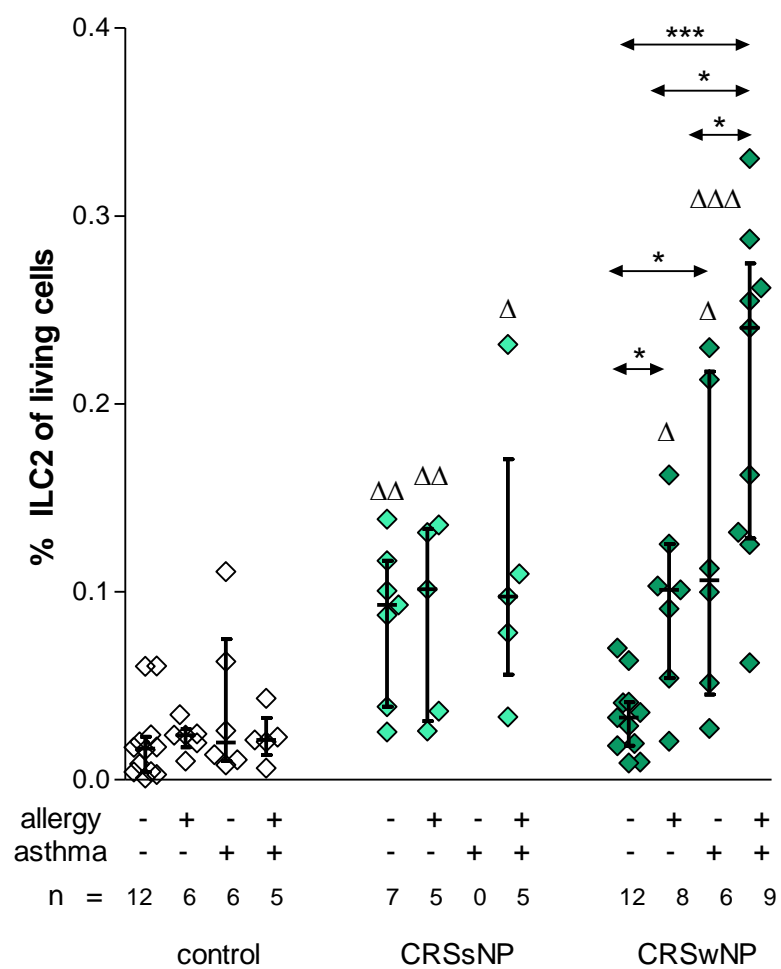

D

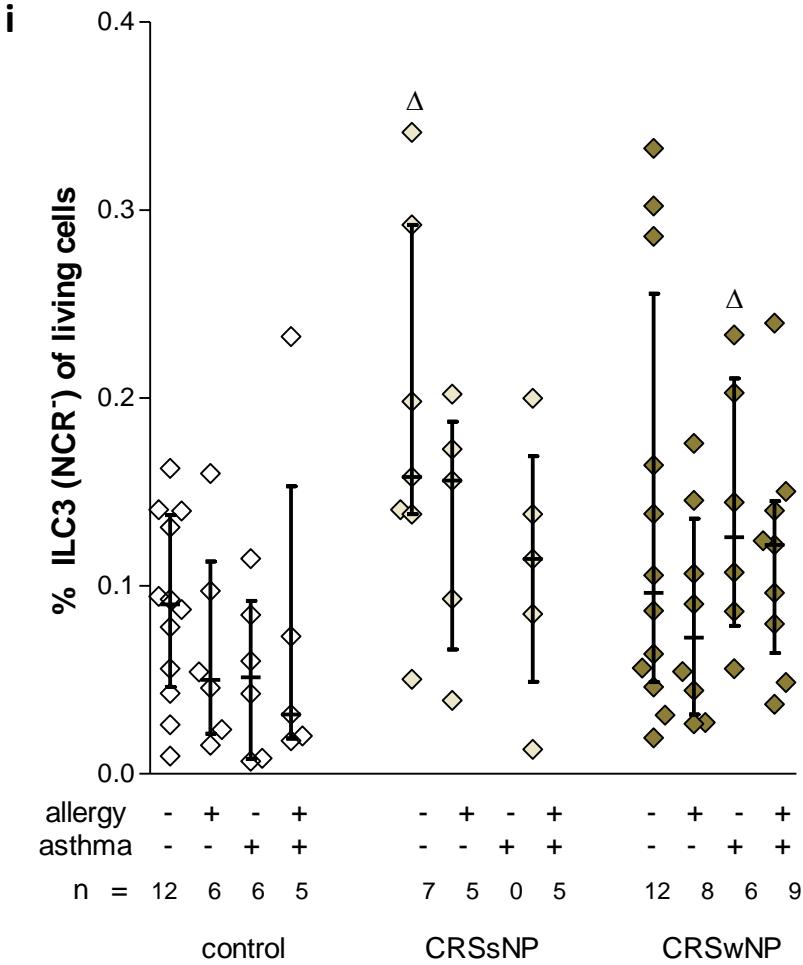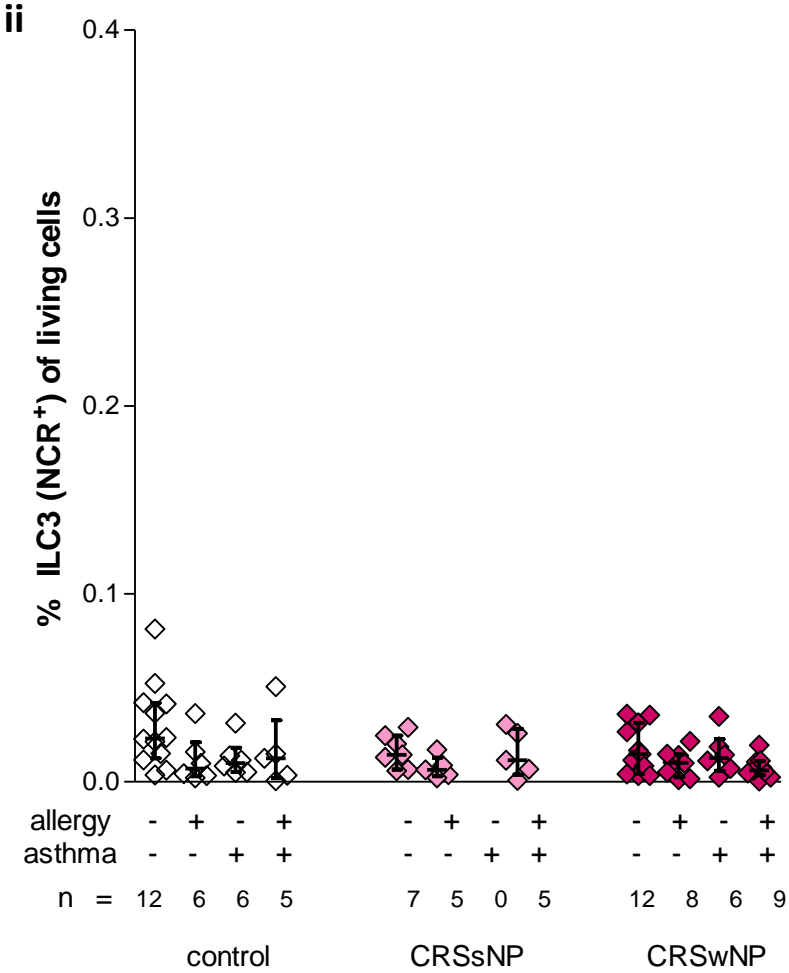

E

i

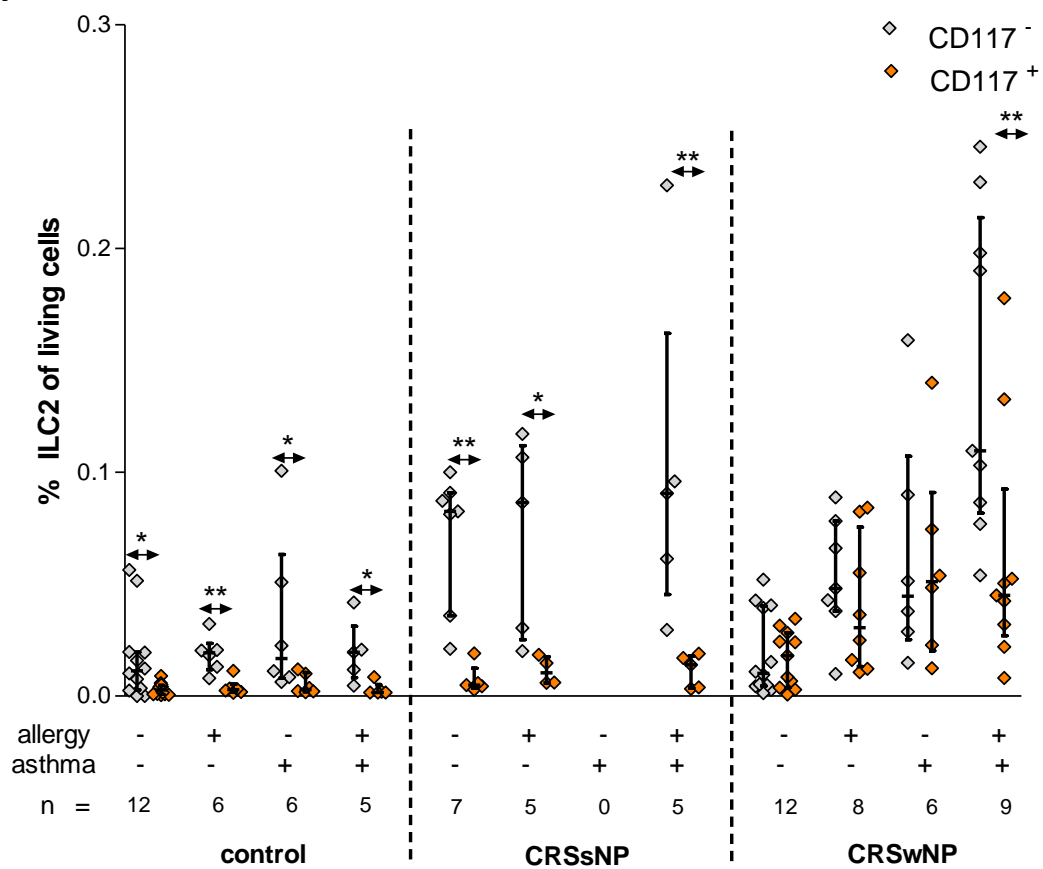

ii

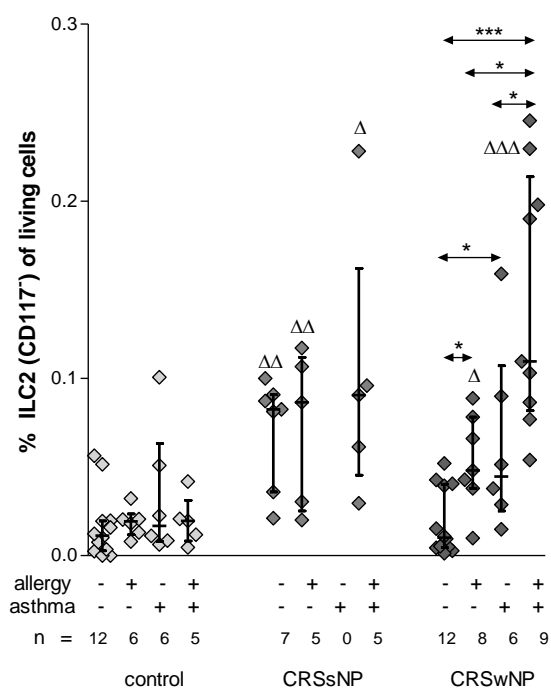

iii

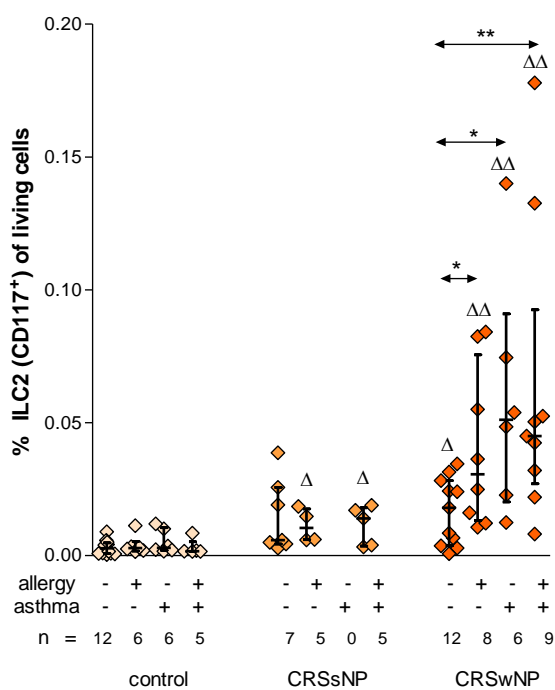

F

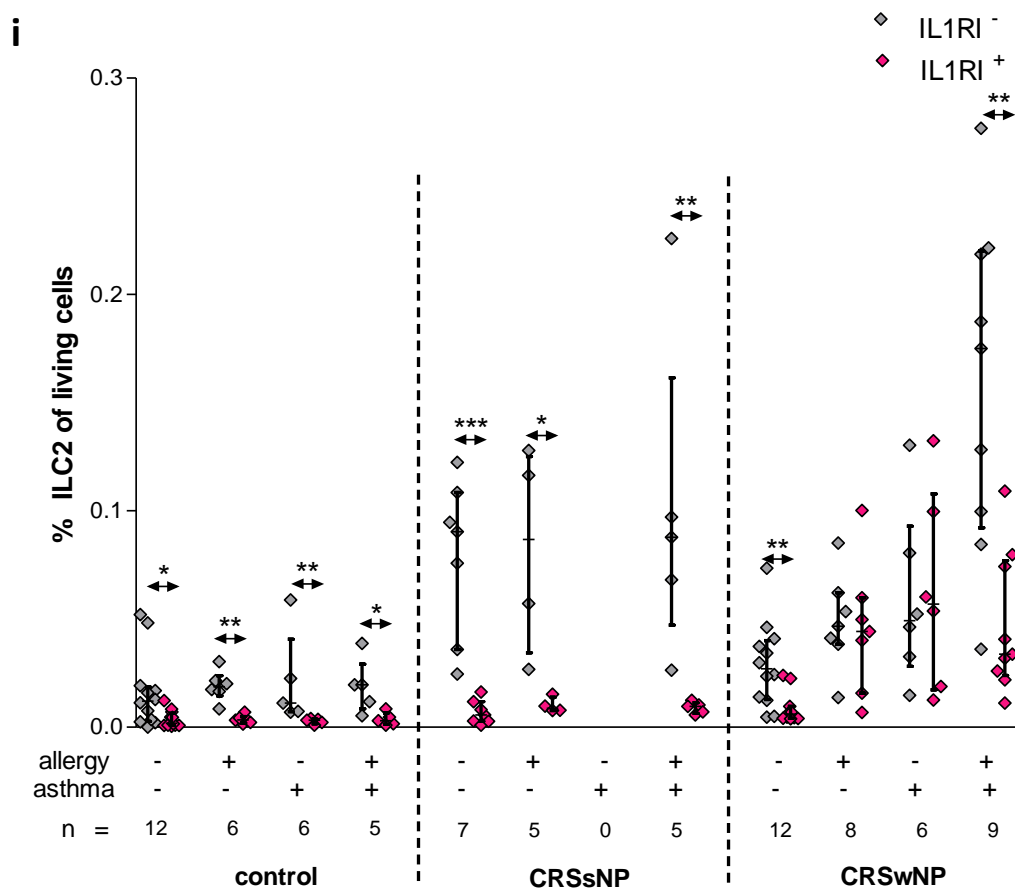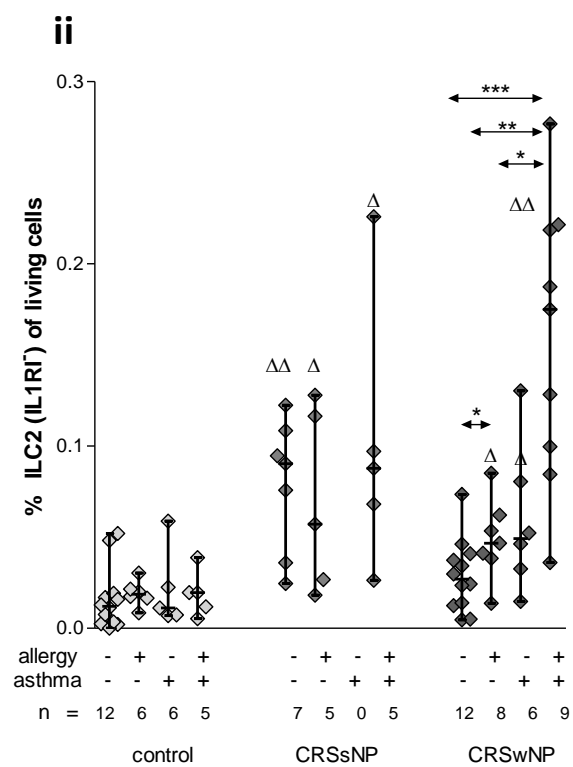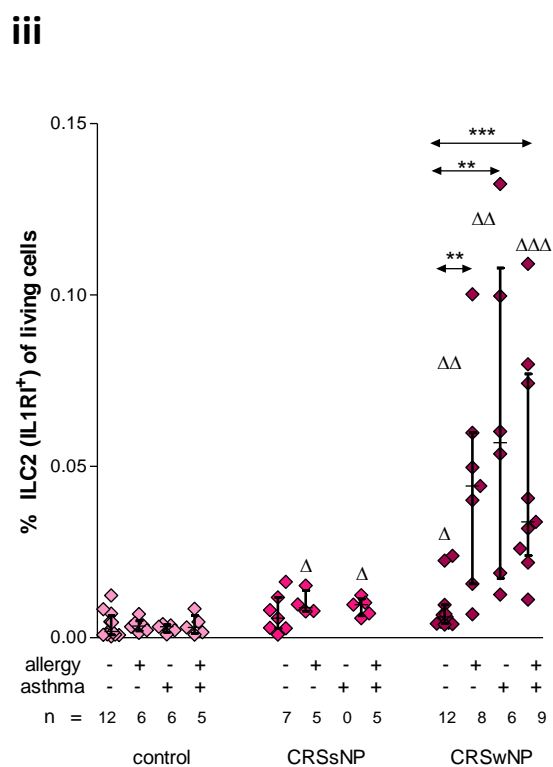

Supplement: inline-supplementary-material-7 [file inline-supplementary-material-7.pdf]
